# Supplementary material for: Insulin Receptor Substrate 1 Gly972Arg (rs1801278) Polymorphism Is Associated with Obesity and Insulin Resistance in Kashmiri Women with Polycystic Ovary Syndrome
Source: MDPI journal article supplement (doi:10.3390/genes13081463), 2022-08-17
Supplement: s1 [file s1]

## **Supplementary Material**

### **Insulin Receptor Substrate 1 Gly972Arg (Rs1801278) Polymorphism Is Associated with Obesity and Insulin Resistance in Kashmiri Women with Polycystic Ovary Syndrome**

Shayaq Ul Abeer Rasool <sup>1</sup>, Sairish Ashraf <sup>2</sup>, Mudasar Nabi <sup>2</sup>, Shajrul Amin <sup>2,\*</sup>

1. Department of Biotechnology, University of Kashmir, Srinagar India
2. Department of Biochemistry, University of Kashmir, Srinagar India

\*Corresponding Author

#### **Shajrul Amin**

Professor & Head

Department of Biochemistry, University of Kashmir,  
Srinagar-190006, India.

Tel: +91-9419018174

Email: shajrulamin@uok.edu.in

**Table S1: Clinical characteristics, hormonal levels, metabolic and biochemical profile of RS-1 SNP rs1801278 dominant genotype model in PCOS women**

| Parameter                | PCOS          |               | P value | Controls      |               | P Value |
|--------------------------|---------------|---------------|---------|---------------|---------------|---------|
|                          | GG+GA (n=241) | AA (n=8)      |         | GG+GA (n=98)  | AA (n=2)      |         |
| Age (years)              | 22.35 ±4.05   | 21.89 ±3.53   | 0.315   | 21.95 ±3.14   | 21.50 ±0.71   | 0.841   |
| Weight (kg)              | 59.77 ±11.63  | 59.94 ±9.48   | 0.967   | 51.92 ±6.52   | 53.00 ±18.38  | 0.823   |
| Height (m)               | 1.57 ±0.05    | 1.55 ±0.04    | 0.264   | 1.57 ±0.05    | 1.57 ±0.06    | 1.000   |
| BMI (kg/m <sup>2</sup> ) | 24.25 ±4.70   | 24.98 ±4.16   | 0.665   | 21.16 ±2.43   | 21.27 ±5.921  | 0.951   |
| Waist (cm)               | 83.05 ±11.10  | 83.83 ±11.27  | 0.845   | 76.94 ±7.03   | 80.50 ±13.44  | 0.485   |
| Hip (cm)                 | 93.41 ±8.26   | 95.39 ±7.85   | 0.504   | 91.21 ±6.36   | 95.50 ±2.12   | 0.345   |
| WHR                      | 0.89 ±0.08    | 0.88 ±0.07    | 0.727   | 0.84 ±0.05    | 0.84 ±0.12    | 1.000   |
| WHtR                     | 0.53 ±0.07    | 0.54 ±0.07    | 0.691   | 0.49 ±0.04    | 0.51 ±0.07    | 0.490   |
| BAI                      | 29.54 ±4.69   | 31.44 ±4.32   | 0.259   | 28.58 ±3.05   | 30.58 ±1.55   | 0.359   |
| SBP (mmHg)               | 120.46 ±7.48  | 117.94 ±7.36  | 0.349   | 119.06 ±5.34  | 114.00 ±8.49  | 0.191   |
| DBP (mmHg)               | 80.65 ±5.87   | 80.91 ±6.56   | 0.902   | 79.39 ±5.23   | 76.00 ±5.66   | 0.367   |
| Mena (years)             | 13.15 ±1.13   | 13.08 ±1.10   | 0.863   | 13.31 ±1.07   | 12.00 ±0.00   | 0.088   |
| FG Score                 | 14.03 ±6.49   | 12.72 ±6.90   | 0.575   | 4.51 ±1.84    | 5.50 ±2.12    | 0.453   |
| LH (IU/L)                | 11.36 ±9.68   | 9.99 ±6.87    | 0.694   | 6.61 ±2.36    | 8.80 ±0.49    | 0.195   |
| FSH (IU/L)               | 6.06 ±1.85    | 6.29 ±2.13    | 0.731   | 6.95 ±1.93    | 4.39 ±3.27    | 0.068   |
| TT (ng/dL)               | 60.98 ±22.95  | 60.54 ±26.31  | 0.957   | 33.68 ±15.29  | 56.77 ±19.29  | 0.037*  |
| PRL (ng/mL)              | 13.32 ±5.59   | 12.89 ±5.15   | 0.830   | 10.44 ±4.95   | 13.66 ±6.05   | 0.365   |
| TSH (uIU/L)              | 3.21 ±1.45    | 3.40 ±1.39    | 0.715   | 3.00 ±1.48    | 2.63 ±1.05    | 0.726   |
| SHBG (nmol/L)            | 50.18 ±21.65  | 48.19 ±18.28  | 0.797   | 65.21 ±25.42  | 50.17 ±29.40  | 0.410   |
| Andro (ng/mL)            | 3.26 ±0.87    | 3.16 ±1.00    | 0.750   | 2.26 ±0.69    | 2.37 ±0.70    | 0.823   |
| DHEAS (ng/mL)            | 3.79 ±1.15    | 3.56 ±1.15    | 0.578   | 2.92 ±1.31    | 2.38 ±0.78    | 0.569   |
| Insulin F (μIU/ml)       | 13.54 ±6.86   | 14.74 ±7.09   | 0.627   | 7.64 ±5.35    | 11.80 ±8.25   | 0.282   |
| Glu F (mg/dL)            | 85.64 ±8.54   | 86.11 ±9.38   | 0.878   | 84.43 ±8.88   | 90.00 ±8.49   | 0.381   |
| Glu 2h (mg/dL)           | 115.70 ±18.21 | 112.17 ±15.98 | 0.588   | 108.41 ±14.36 | 115.50 ±10.61 | 0.49    |
| Chol (mg/dL)             | 154.89 ±34.94 | 150.17 ±31.36 | 0.706   | 135.22 ±19.47 | 129.50 ±7.78  | 0.684   |
| TG (mg/dL)               | 121.08 ±35.79 | 121.00 ±30.05 | 0.995   | 102.66 ±14.92 | 106.00 ±0.00  | 0.753   |
| HOMA IR                  | 2.90 ±1.62    | 3.19 ±1.71    | 0.619   | 1.59 ±1.16    | 2.71 ±2.08    | 0.184   |
| QUICKI                   | 0.33 ±0.02    | 0.33 ±0.02    | 1.000   | 0.38 ±0.05    | 0.34 ±0.04    | 0.264   |
| FAI                      | 5.74 ± 5.64   | 5.48 ±4.36    | 0.897   | 2.15 ±1.55    | 5.21 ±4.39    | 0.008*  |
| LH:FSH                   | 1.92 ±1.28    | 1.65 ± 0.97   | 0.555   | 1.00 ±0.45    | 2.72 ±1.92    | 0.001*  |
| LAP                      | 35.23 ±21.91  | 36.73 ±22.86  | 0.849   | 22.10 ±9.00   | 26.93 ±16.08  | 0.459   |
| Urea                     | 22.67 ±6.01   | 21.31 ±5.44   | 0.528   | 21.21 ±3.32   | 26.62 ±8.09   | 0.028*  |
| Crea (mg/dL)             | 1.02 ±0.43    | 1.05 ±0.41    | 0.846   | 0.80 ±0.13    | 0.90 ±0.11    | 0.283   |
| UA (mg/dL)               | 4.28 ±1.10    | 4.29 ±1.16    | 0.979   | 3.84 ±0.75    | 3.16 ±0.90    | 0.208   |
| AST (U/L)                | 31.29 ±12.39  | 28.60 ±8.89   | 0.543   | 18.39 ±7.90   | 13.75 ±0.35   | 0.410   |
| ALT (U/L)                | 27.89 ±13.86  | 25.78 ±10.77  | 0.670   | 23.56 ±6.78   | 18.35 ±6.86   | 0.285   |

Data presented as Mean  $\pm$ SD. \*P-value <0.05 significant. Data presented as Mean  $\pm$ SD. \*P-value <0.05 significant. P values calculated by Student's t test

PCOS polycystic ovary syndrome, BMI body mass index, SBP systolic blood pressure, DBP diastolic blood pressure, FG Score ferriman gallwey score, LH luteinizing hormone, FSH follicle stimulating hormone, TT total testosterone, PRL Prolactin, TSH thyroid stimulating hormone, SHBG sex hormone binding globin, Andro androstenedione, DHEAS dihydroepiandrosterone sulphate, Glu F glucose fasting, CHOL cholesterol, TG triglycerides, HOMA IR homeostasis model assessment-estimated insulin resistance, QUICKI quantitative insulin sensitivity check index, FAI free androgen index, UA uric acid, AST aspartate aminotransferase, ALT alanine aminotransferase.

**Table S2: Clinical characteristics, hormonal levels, metabolic and biochemical profile of IRS-1 Gly972 polymorphism in additive genotype model**

| Parameter                | PCOS               |                    |                    | P value | Controls                     |                              |                    | P Value |
|--------------------------|--------------------|--------------------|--------------------|---------|------------------------------|------------------------------|--------------------|---------|
|                          | GG (n=154)         | GA (n=87)          | AA (n=8)           |         | GG (n=56)                    | GA (n=42)                    | AA (n=2)           |         |
| Age (years)              | 22.21 $\pm$ 3.74   | 22.60 $\pm$ 4.56   | 25.25 $\pm$ 5.99   | 0.117   | 22.11 $\pm$ 3.21             | 21.83 $\pm$ 3.09             | 21.5 $\pm$ 0.71    | 0.827   |
| Weight (kg)              | 59.12 $\pm$ 10.68  | 60.91 $\pm$ 13.15  | 61.75 $\pm$ 10.67  | 0.464   | 50.77 $\pm$ 6.43             | 53.68 $\pm$ 6.39             | 53.00 $\pm$ 18.38  | 0.143   |
| Height (m)               | 1.58 $\pm$ 0.05    | 1.56 $\pm$ 0.05    | 1.56 $\pm$ 0.06    | 0.194   | 1.56 $\pm$ 0.06              | 1.58 $\pm$ 0.05              | 1.57 $\pm$ 0.06    | 0.277   |
| BMI (kg/m <sup>2</sup> ) | 23.87 $\pm$ 4.41   | 24.92 $\pm$ 5.13   | 25.38 $\pm$ 5.02   | 0.196   | 20.89 $\pm$ 2.32             | 21.63 $\pm$ 2.55             | 21.27 $\pm$ 5.921  | 0.443   |
| Waist (cm)               | 82.63 $\pm$ 10.88  | 83.80 $\pm$ 11.49  | 84.50 $\pm$ 12.92  | 0.691   | 76.80 $\pm$ 7.41             | 77.35 $\pm$ 6.63             | 80.50 $\pm$ 13.44  | 0.763   |
| Hip (cm)                 | 92.44 $\pm$ 8.25   | 95.14 $\pm$ 8.04   | 95.25 $\pm$ 8.61   | 0.41    | 90.52 $\pm$ 6.26             | 92.25 $\pm$ 6.57             | 95.50 $\pm$ 2.12   | 0.291   |
| WHR                      | 0.89 $\pm$ 0.09    | 0.88 $\pm$ 0.07    | 0.88 $\pm$ 0.09    | 0.376   | 0.85 $\pm$ 0.06              | 0.84 $\pm$ 0.04              | 0.84 $\pm$ 0.12    | 0.620   |
| WHtR                     | 0.52 $\pm$ 0.07    | 0.54 $\pm$ 0.07    | 0.54 $\pm$ 0.09    | 0.437   | 0.49 $\pm$ 0.05              | 0.49 $\pm$ 0.04              | 0.51 $\pm$ 0.07    | 0.748   |
| BAI                      | 28.86 $\pm$ 4.84   | 30.74 $\pm$ 4.17   | 30.89 $\pm$ 5.92   | 0.002*  | 28.56 $\pm$ 3.04             | 28.67 $\pm$ 3.13             | 30.58 $\pm$ 1.55   | 0.658   |
| SBP (mmHg)               | 120.50 $\pm$ 7.36  | 120.39 $\pm$ 7.72  | 123.75 $\pm$ 5.18  | 0.468   | 118.93 $\pm$ 5.54            | 119.20 $\pm$ 5.26            | 114.00 $\pm$ 8.49  | 0.409   |
| DBP (mmHg)               | 80.50 $\pm$ 5.46   | 80.91 $\pm$ 6.56   | 82.88 $\pm$ 4.19   | 0.497   | 79.21 $\pm$ 5.27             | 79.60 $\pm$ 5.36             | 76.00 $\pm$ 5.66   | 0.620   |
| Mena (years)             | 13.19 $\pm$ 1.14   | 13.08 $\pm$ 1.10   | 12.75 $\pm$ 1.39   | 0.464   | 13.30 $\pm$ 1.04             | 13.28 $\pm$ 1.13             | 12.00 $\pm$ 0.00   | 0.237   |
| FG Score                 | 14.77 $\pm$ 6.15   | 12.72 $\pm$ 6.90   | 11.63 $\pm$ 9.26   | 0.04    | 4.63 $\pm$ 2.02              | 4.35 $\pm$ 1.58              | 5.50 $\pm$ 2.12    | 0.590   |
| LH (IU/L)                | 12.28 $\pm$ 10.92  | 9.99 $\pm$ 6.87    | 9.48 $\pm$ 3.03    | 0.212   | 6.51 $\pm$ 2.52              | 6.63 $\pm$ 2.15              | 8.80 $\pm$ 0.49    | 0.386   |
| FSH (IU/L)               | 5.94 $\pm$ 1.66    | 6.29 $\pm$ 2.13    | 6.75 $\pm$ 2.43    | 0.225   | 6.87 $\pm$ 1.95              | 6.95 $\pm$ 1.92              | 4.39 $\pm$ 3.27    | 0.174   |
| TT (ng/dL)               | 61.22 $\pm$ 20.89  | 60.54 $\pm$ 26.31  | 64.73 $\pm$ 26.44  | 0.895   | 33.90 $\pm$ 16.89            | 33.40 $\pm$ 13.35            | 56.77 $\pm$ 19.29  | 0.115   |
| PRL (ng/mL)              | 13.56 $\pm$ 5.84   | 12.89 $\pm$ 5.15   | 12.43 $\pm$ 6.31   | 0.619   | 10.71 $\pm$ 5.28             | 10.10 $\pm$ 4.58             | 13.66 $\pm$ 6.05   | 0.811   |
| TSH (uIU/L)              | 3.10 $\pm$ 1.48    | 3.40 $\pm$ 1.39    | 2.99 $\pm$ 1.12    | 0.076   | 3.05 $\pm$ 1.73              | 2.91 $\pm$ 1.08              | 2.63 $\pm$ 1.05    | 0.878   |
| SHBG (nmol/L)            | 51.30 $\pm$ 23.33  | 48.19 $\pm$ 18.28  | 47.08 $\pm$ 23.09  | 0.522   | 62.86 $\pm$ 23.34            | 67.69 $\pm$ 27.75            | 50.17 $\pm$ 29.40  | 0.409   |
| Andro (ng/mL)            | 3.32 $\pm$ 0.78    | 3.16 $\pm$ 1.00    | 3.30 $\pm$ 0.74    | 0.334   | 2.30 $\pm$ 0.74              | 2.22 $\pm$ 0.63              | 2.37 $\pm$ 0.70    | 0.734   |
| DHEAS (ng/mL)            | 3.92 $\pm$ 1.13    | 3.56 $\pm$ 1.15    | 3.75 $\pm$ 1.30    | 0.066   | 2.98 $\pm$ 1.46              | 2.82 $\pm$ 1.05              | 2.38 $\pm$ 0.78    | 0.734   |
| Insulin ( $\mu$ IU/ml)   | 12.86 $\pm$ 6.66   | 14.74 $\pm$ 7.09   | 13.20 $\pm$ 9.01   | 0.128   | 7.45 $\pm$ 6.08              | 8.05 $\pm$ 4.29              | 11.80 $\pm$ 8.25   | 0.519   |
| Glu F (mg/dL)            | 85.37 $\pm$ 8.04   | 86.11 $\pm$ 9.38   | 87.50 $\pm$ 10.58  | 0.677   | 84.31 $\pm$ 9.39             | 84.13 $\pm$ 8.17             | 90.00 $\pm$ 8.49   | 0.678   |
| Glu 2h (mg/dL)           | 117.69 $\pm$ 19.11 | 112.17 $\pm$ 15.98 | 119.88 $\pm$ 27.90 | 0.069   | 109.25 $\pm$ 15.87           | 107.33 $\pm$ 12.43           | 115.50 $\pm$ 10.61 | 0.632   |
| Chol (mg/dL)             | 157.56 $\pm$ 36.63 | 150.17 $\pm$ 31.36 | 149.75 $\pm$ 25.28 | 0.261   | 132.57 $\pm$ 18.98           | 137.83 $\pm$ 18.38           | 129.50 $\pm$ 7.78  | 0.269   |
| TG (mg/dL)               | 121.13 $\pm$ 38.75 | 121.00 $\pm$ 30.05 | 105.88 $\pm$ 25.67 | 0.492   | 101.20 $\pm$ 13.18           | 105.19 $\pm$ 17.15           | 106.00 $\pm$ 0.00  | 0.504   |
| HOMA IR                  | 2.74 $\pm$ 1.55    | 3.19 $\pm$ 1.71    | 2.97 $\pm$ 2.21    | 0.114   | 1.56 $\pm$ 1.33              | 1.66 $\pm$ 0.91              | 2.71 $\pm$ 2.08    | 0.394   |
| QUICKI                   | 0.331 $\pm$ 0.02   | 0.325 $\pm$ 0.02   | 0.334 $\pm$ 0.03   | 0.091   | 0.38 $\pm$ 0.04              | 0.37 $\pm$ 0.05              | 0.34 $\pm$ 0.04    | 0.279   |
| FAI                      | 5.89 $\pm$ 6.26    | 5.48 $\pm$ 4.36    | 6.47 $\pm$ 5.13    | 0.802   | 2.20 $\pm$ 1.50              | 2.11 $\pm$ 1.67              | 5.21 $\pm$ 4.39    | 0.031   |
| LH:FSH                   | 2.07 $\pm$ 1.41    | 1.65 $\pm$ 0.97    | 1.60 $\pm$ 0.76    | 0.041   | 1.01 $\pm$ 0.51 <sup>b</sup> | 0.99 $\pm$ 0.37 <sup>c</sup> | 2.72 $\pm$ 1.92    | 0.001   |
| LAP                      | 34.38 $\pm$ 21.38  | 36.73 $\pm$ 22.86  | 33.08 $\pm$ 19.83  | 0.698   | 21.64 $\pm$ 9.39             | 23.10 $\pm$ 8.56             | 26.93 $\pm$ 16.08  | 0.645   |
| Urea (mg/dL)             | 23.45 $\pm$ 6.20   | 21.31 $\pm$ 5.44   | 24.88 $\pm$ 4.39   | 0.016*  | 21.38 $\pm$ 3.58             | 20.89 $\pm$ 2.93             | 26.62 $\pm$ 8.09   | 0.077   |
| Crea (mg/dL)             | 1.01 $\pm$ 0.44    | 1.05 $\pm$ 0.41    | 1.19 $\pm$ 0.39    | 0.459   | 0.78 $\pm$ 0.12              | 0.83 $\pm$ 0.15              | 0.90 $\pm$ 0.11    | 0.127   |
| UA (mg/dL)               | 4.27 $\pm$ 1.06    | 4.29 $\pm$ 1.16    | 4.13 $\pm$ 0.79    | 0.932   | 3.77 $\pm$ 0.66              | 3.95 $\pm$ 0.88              | 3.16 $\pm$ 0.90    | 0.524   |

|           |              |              |              |        |             |             |             |       |
|-----------|--------------|--------------|--------------|--------|-------------|-------------|-------------|-------|
| AST (U/L) | 32.81 ±13.78 | 28.60±8.89   | 34.63 ±15.10 | 0.031* | 18.23 ±7.83 | 18.70 ±8.23 | 13.75 ±0.35 | 0.691 |
| ALT (U/L) | 29.08 ±15.23 | 25.78 ±10.77 | 26.38 ±13.55 | 0.198  | 23.01 ±6.42 | 24.56 ±7.32 | 18.35 ±6.86 | 0.368 |

Data presented as Mean ±SD. \*P-value <0.05 significant. P values calculated by one way Analysis of Variance (ANOVA) independent standard weighted-means analysis and intergroup association tested by Post hoc Tukey HSD test.

PCOS polycystic ovary syndrome, BMI body mass index, SBP systolic blood pressure, DBP diastolic blood pressure, FG Score ferriman gallwey score, LH luteinizing hormone, FSH follicle stimulating hormone, TT total testosterone, PRL Prolactin, TSH thyroid stimulating hormone, SHBG sex hormone binding globin, Andro androstenrdione, DHEAS dihydroepiandrostenedione sulphate, Glu F glucose fasting, CHOL cholesterol, TG triglycerides, HOMA IR homeostasis model assessment-estimated insulin resistance, QUICKI quantitative insulin sensitivity check index, FAI free androgen index, UA uric acid, AST aspartate aminotransferase, ALT alanine aminotransferase.

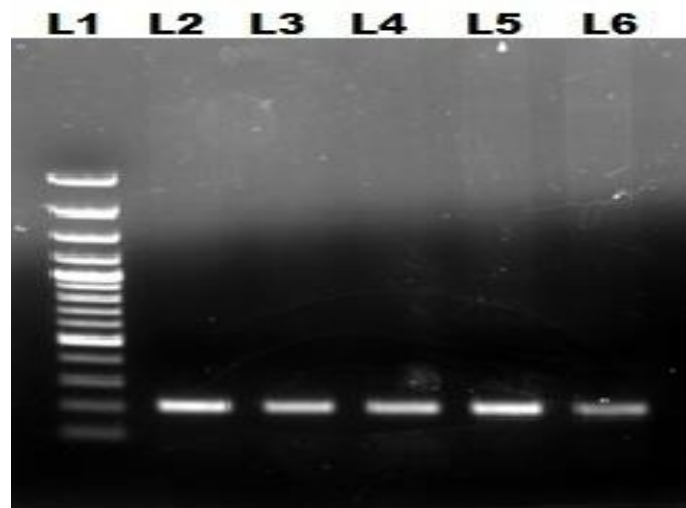

**Figure S1: Representative picture of PCR Amplification of IRS-1 gene containing rs1801278 SNP (Lane 1 shows 100bp DNA ladder, Lanes 2-6 show 198bp PCR product)**

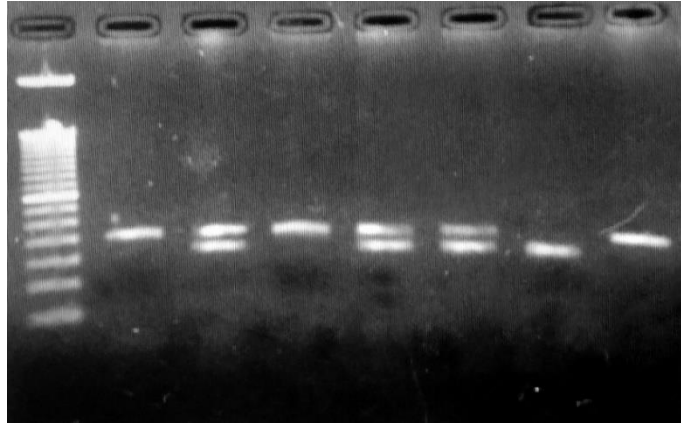

**Figure S2: Representative picture of digestion of 198 bp PCR product of IRS-1 SNP by SmaI**

Lane 1 shows 50bp Ladder, Lanes 2,4 and 8 show wild GG genotype represented by undigested 198bp PCR product, lanes 3, 5 and 6 show heterozygous GA genotype represented by 198bp+171bp fragments and lane 7 shows AA genotype represented by 171bpbp fragments
